1 **STAT3 inhibits Myocardin induced cardiac hypertrophy**

2

3 Xing-Hua Liao<sup>a1\*</sup>, Yuan Xiang<sup>a1</sup>, Jia-Peng Li<sup>a</sup>, Hui Li<sup>a</sup>, You Huang<sup>a</sup>, Chao Shen<sup>a</sup>

4 Hui-Min Zhang<sup>a</sup> Tong-Cun Zhang<sup>a,b\*</sup>

5

6 <sup>a</sup> Institute of Biology and Medicine, College of Life Sciences and Health, Wuhan  
7 University of Science and Technology, Hubei, 430081, P.R.China.

8 <sup>b</sup> Key Laboratory of Industrial Fermentation Microbiology, Ministry of Education  
9 and Tianjin, College of Biotechnology, Tianjin University of Science and Technology,  
10 Tianjin, 300457, P.R.China.

11

12 \*Corresponding author: Prof. Tong-Cun Zhang, Institute of Biology and Medicine,  
13 College of Life Sciences and Health, Wuhan University of Science and Technology,  
14 Hubei, 430081, P.R.China, Tel: 027 6889 3590. Fax: 027 6889 3590, E-mail:  
15 zhangtongcun@wust.edu.cn and Prof. Xing-Hua Liao, Institute of Biology and  
16 Medicine, College of Life Sciences and Health, Wuhan University of Science and  
17 Technology, Hubei, 430081, P.R.China, Tel: 027 6889 3590. Fax: 027 6889 3590,  
18 E-mail: xinghualiao@hotmail.com.

19

20

21

22

23

24

25

26

27 <sup>1</sup>These authors contributed equally to this work.

## 28 **Abstract**

29 **Background:** In order to explore the molecular mechanism of cardiomyocyte-dependent  
30 myocardial gene expression and cardiomyocyte differentiation in cardiac hypertrophy, and to  
31 provide new insights for cardiac hypertrophy.

32 **Methods:** Cardiac myocytes were isolated from day 1-3 Sprague-Dawley rat pups.  
33 Real time quantitative PCR, western blot and immunocytochemistry Assay were  
34 used to detect the expression and localization of related genes. CO-IP was used to  
35 detect direct protein interactions between Myocardin and STAT3. Luciferase reporter  
36 assay and chromatin immunoprecipitation were used to detect the binding of  
37 Myocardin to the promoter of a downstream target gene. Microinjection of zebrafish  
38 embryos was used to examine the effects of STAT3 and Myocardin interactions on  
39 cardiac development in vivo

40 **Results:** The N-terminus of STAT3 directly binds to the basic domain of myocardin  
41 and inhibits the transcriptional activity of Myocardin-mediated cardiac-specific  
42 genes ANF and  $\alpha$ -actinin, thereby inhibiting their expression, and further inhibit  
43 myocardin-mediated cardiac hypertrophy in vivo.

44 **Conclusions:** In summary, our report states that signal transduction and transcriptional  
45 activation factor 3 (STAT3) are inhibitors of the major cardiac hypertrophic  
46 transcription factor Myocardiin, which is required for cardiomyocyte differentiation.  
47 The STAT3-cardiacin interaction identified nuclear hormone receptor-mediated and  
48 cardiac-specific gene-regulated convergence sites and suggested a possible  
49 mechanism for cardioprotective effects.

50 **Key words:** STAT3, Myocardin, Cardiac hypertrophy, Transcriptional regulation

## 51 **Background**

52 Myocardin play a key role in cardiovascular development and are specifically  
53 expressed in the heart and smooth muscle cells. (1) In addition, Myocardiin is a  
54 co-activator of serum response factor (SRF). SRF can be combined with the CArG  
55 box (CC [A/T] <sub>6</sub>GG), which is a DNA consensus sequence located in the control  
56 region of many growth factor regulated genes and muscle-specific genes.(2)  
57 Consistent with the role of Myocardiin as a transducer of hypertrophy signals, the  
58 forced expression of Myocardin in cardiomyocytes is sufficient to replace the  
59 hypertrophy signal and induce cardiac hypertrophy and fetal cardiac genetic  
60 programs.(3) In a word, Myocardin is a key component of molecular switches that  
61 regulate SRF's ability to mediate cell proliferation and muscle cell  
62 differentiation.(4-6)

63 Signal transducer and activator of transcription (STAT) 3 is involved in cell survival,

64 proliferation, and immune response.(7) STAT3 has been reported as a key mediator  
65 of cardiac remodeling in response to cytokines, especially glycoproteins (gp) 130  
66 family, including cytokines of interleukin 6 (IL-6) and leukemia inhibitory factor  
67 (LIF).(8-10)

68 IL-6 binding results in receptor dimerization, which induces tyrosine  
69 phosphorylation and STAT3 activation through Janus-activated kinases. Activated  
70 STAT3 is then dimerized and transported to the nucleus to activate or inhibit  
71 downstream target gene expression. STAT3, as a key mediator of myocardial cell  
72 survival, seems to play an essential role in inducing myocardial hypertrophy. So far,  
73 there were not some researches about the effect of STAT3 in Myocardin-induced  
74 cardiomyocyte hypertrophy. This study reveals a relationship between Myocardin  
75 and STAT3 which are crucial transcription factors in cardiomyocyte hypertrophy  
76 development.

## 77 **Methods**

### 78 **Cell culture**

79 Cardiac myocytes were isolated from day 1-3 Sprague-Dawley rat pups as described  
80 previously.(11-13) COS7 cells were bought from American Type Culture Collection  
81 (ATCC) and cultured in Dulbecco's modified Eagle's medium (DMEM) (Invitrogen)  
82 supplemented 10% fetal bovine serum (FBS) in the incubator with a humidified  
83 atmosphere (5% CO<sub>2</sub>, 37°C).

### 84 **Plasmid construction and transfection**

85 To overexpress Myocardin and STAT3, nucleotide fragments encoding the fusion Flag  
86 tag protein and full-length of Myocardin and encoding the fusion Myc tag protein and  
87 full-length of STAT3 were cloned to mammalian expression vector pCDNA3.1  
88 (Invitrogen) (Flag-pCDNA3.1-Myocardin, Myc-pCDNA3.1-STAT3). Chemically  
89 synthesized small interfering RNA (Si-STAT3) and scrambled negative control (NC)  
90 Si-NC (Ribobio) to knockdown STAT3 expression. ANF-1000-luciferase reporter,  
91 ANF-337-luciferase reporter, ANF-236-luciferase reporter and ANF-121-luciferase  
92 reporter plasmid, ANF-1000-M-far-CArG, ANF-1000-M-near-CArG,  
93 ANF-1000-M-GAS, ANF-1000-M-far-CArG and GAS, ANF-1000-M-GAS and  
94 near-CArG and ANF-1000-M-far-CArG and near-CArG-luciferase reporter, were all  
95 constructed into pGL3-basic vector (Promega). All plasmid constructs were  
96 transfected into COS-7 cells or cardiomyocytes with FuGENE® HD, and the  
97 experimental procedures were strictly in accordance with the manufacturer's  
98 instructions.

99 **Immunocytochemistry Assay**

100 Immunofluorescence assays were performed as described previously.(14) After added  
101 the primary antibodies (goat anti-rabbit ANF (Abcam), goat anti-mouse  $\alpha$ -actinin  
102 (Sigma), and then added appropriate secondary antibodies (FITC-goat anti-rabbit IgG,  
103 FITC-goat anti-mouse IgG Santa Cruz), respectively. DAPI  
104 (4',6'-diamidino-2-phenylindole) was used to stain nuclei, the samples were evaluated  
105 under inverted fluorescence microscope (Olympus).

106 **Reverse-transcription polymerase chain reaction (RT-PCR) and real time**  
107 **quantitative polymerase chain reaction (qPCR)**

108 Methods for performing RT-PCR and qPCR analysis have been described  
109 previously.(14) Briefly, total RNA was isolated from cells using Trizol reagent  
110 (Invitrogen), the samples were reverse-transcribed by using M-MLV reverse  
111 transcriptase (Promega) according to the manufacturer's instructions. The PCR primer  
112 sequences are as follows: Glyceraldehyde-3-phosphate dehydrogenase (GAPDH): F-  
113 GGAGCGAGATCCCTCCAAAAT, R- GGCTGTTGTCATACTTCTCATGG; ANF:  
114 F- CAACGCAGACCTGATGGATTT, R- AGCCCCGCTTCTTCATTC;  $\alpha$ -actinin:  
115 F-ATTGGTATGGAGTCTGCCG, R-TCCTGAGTGTAAGGTAGCCG; Myocardin:  
116 F-AGAACTCAGGGGCACACGAAG, R-CCACCTTGTCAGAAGATTGTAAACC.  
117 GAPDH was used as an internal control.

118 **Western Blot (WB)**

119 The operation process of Western Blot has been described previously.(14) Cells were  
120 lysed in lysis buffer to extract total protein. The resulting protein was then analyzed  
121 on a 12% sodium lauryl sulfate polyacrylamide gel (SDS-PAGE). The proteins were  
122 transferred to a PVDF membrane and blocked for 60 min at room temperature in 5%  
123 skim milk powder (wt/vol) in TBST (TBS+0.1% Tween-20, vol/vol). After mouse  
124 polyclonal antibodies against Myocardin (Abcam), p-ERK (Abcam), rabbit polyclonal  
125 antibodies against ANF (Abcam), mouse monoclonal antibodies against  $\alpha$ -actinin  
126 (Sigma) and appropriate secondary antibodies (HRP-goat anti-mouse IgG, HRP-goat  
127 anti- rabbit IgG, HRP rabbit-anti-goat IgG, Santa Cruz) were incubated. The specific  
128 proteins were visualized by odyssey detection. GAPDH expression was used as an  
129 internal control.

130 **Luciferase assay**

131 The dual luciferase assay system (Promega) was used to measure luciferase activity  
132 and was standardized for transfection efficiency. Normalize results by dividing

133 Firefly luciferase activity by Renilla luciferase activity of the same sample.

#### 134 **Coimmunoprecipitation assay (CO-IP)**

135 A plasmid-based expression vector encoding Flag-Myocardin and Myc-STAT3 was  
136 co-transfected into COS7 cells. Lysates were collected 48 h after transfection and  
137 Flag-Myocardin was precipitated using Flag antibodies. The resulting mixture was  
138 washed, subjected to sodium dodecyl sulfate-polyacrylamide gel electrophoresis  
139 (PAGE), transferred to a polyvinylidene fluoride membrane, first developed by Myc  
140 antibody to visualize Myc-STAT3, then peeled off and again with Flag antibody Probe  
141 to reveal Flag-Myocardin. Myc-STAT3 was then precipitated using Myc antibody.  
142 The resulting mixture was washed, subjected to PAGE, transferred to a polyvinylidene  
143 fluoride membrane, first developed by Flag antibody to reveal Flag-Myocardin, then  
144 peeled off and re-examined with Myc antibody to reveal Myc-STAT3.

#### 145 **Chromatin Immunoprecipitation (ChIP) assay**

146 ChIP analysis was performed using an enzymatic chromatin IP (magnetic beads) kit  
147 (CST) in Cardiac myocytes transfected with Flag-Myocardin for 24 h. Proteins  
148 bound to DNA were crosslinked using formaldehyde at a final concentration of 1%  
149 for 20 min at room temperature. Protein-DNA complexes were immunoprecipitated  
150 using anti-Flag antibody (Santa Cruz) for Flag-Myocardin. The signal of  
151 Myocardin/ANF promoter complexes was measured by qRT-PCR. The primers used  
152 for amplification of the human ANF promoter were (ChIP-ANF-promoter-CArG1  
153 forward: GCTGCTCAAGGCAAAGG) and (ChIP-ANF-promoter-CArG1 reverse:  
154 AGAGCTGGAACCCTCCC); (ChIP-ANF-promoter-CArG2 forward:  
155 ACCCACGAGGCCAATGAATC) and (ChIP-ANF-promoter-CArG2 reverse:  
156 GCTCCCTCTGCTTGCACTCA). For the analysis of ChIP-qRT-PCR experimental  
157 results, calculate the enrichment relative to the input chromatin according to the delta  
158 Ct method with the percentages been calculated using the formula  $2^{-\Delta Ct}$ , where  $\Delta Ct$   
159 is Ct (ChIP-template)-Ct (Input). A standard curve from one of the dilution inputs  
160 was included in the run to keep the reaction efficiency between 95% and 105%.  
161 qPCR was performed separately for each ChIP assay on control areas that should not  
162 bind myocardiin. The ChIP assay was considered specific if in the control region the  
163 enrichment was not above the enrichment of the non-specific immunoprecipitated  
164 sample made with normal rabbit immunoglobulin G.

#### 165 **Zebrafish Strains and Microinjection**

166 Dispose in accordance with local animal welfare regulations and maintain in

167 accordance with standard procedures (www.ZFIN.org). The experiments were  
168 evaluated by the Animal Experiment Committee (DierExperimenten Commissie-DEC)  
169 and evaluated by the Animal Association Committee of Wuhan University of Science  
170 and Technology. The experimental procedure was in accordance with Directive  
171 2010/63 / EU of the European Parliament on the protection of animals. The zebrafish  
172 strains used in this study were raised according to standard procedures. In order to  
173 knock down endogenous expression of Myocardin and STST3 in zebrafish,  
174 morpholinos (MO): Myocardin-MO, STST3-MO and control-MO targeting ATG(15)  
175 were synthesized from Gene Tools (Philomath, OR). Wild-type zebrafish embryo was  
176 injected at one-two cell stage with either Myocardin-MO, STST3-MO or control-MO.  
177 Zebrafish phenotype was analyzed under stereo microscope as previously  
178 described.(16)

### 179 **Whole-Mount Confocal Microscopy and Morphometric Analyses.**

180 In order to observe the shape and development of the heart, Whole-Mount Confocal  
181 Microscopy and Morphometric Analyses were used, as described previously.(16)  
182 Briefly, in order to examine the embryo heart, zebrafish embryos were anesthetized  
183 with 0.003% tricaine, place the ventral side of the embryo in the observation chamber  
184 towards the microwell, facing 45° to the right.. Confocal images were captured by  
185 using a Zeiss LSM 510 Confocal Microscope System. The confocal pinholes were  
186 adjusted to 1 Airy unit to achieve an optimal z resolution of 0.75 N.A. and obtain  
187 continuous slices of 0.9 μm thickness. Images were acquired at 0.45 μm intervals. 3D  
188 projections were constructed by using the LSM Browser software (Zeiss), and  
189 analysis was performed by Image J software that reads .lsm files  
190 (<http://rsb.info.nih.gov/ij>).

### 191 **Statistical Analysis**

192 Data were expressed as mean±SE and accompanied by the number of experiments  
193 performed independently, and analyzed by t-test. Differences at  $P<0.05$  were  
194 considered Significant differences in statistics.

## 195 **Results**

### 196 **STAT3 antagonizes the activation of myocardial genes by Myocardin.**

197 Myocardin is reported as a key component of molecular switches that regulate  
198 SRF-mediated cell proliferation and myocyte differentiation.(1) STAT3 is a critical  
199 mediator for survival of cardiomyocytes and appears to be essential in the induction  
200 of cardiac myocyte hypertrophy. To explore whether STAT3 synergizes with

201 Myocardin to promote cardiac hypertrophy, cardiomyocytes were transfected with  
202 Myocardin, STAT3 and Myocardin/STAT3 plasmids, and the mRNA and protein  
203 levels of cardiac genes were quantified by qPCR and WB. Our results indicated that  
204 overexpression of Myocardin significantly activated the expression of cardiac genes  
205 (ANF and  $\alpha$ -actinin), while co-transfected Myocardin and STAT3 reduced cardiac  
206 gene expression induced by Myocardin (Fig. 1A-C). We also detected the ANF and  
207  $\alpha$ -actinin gene expression and localization by immunofluorescence, the result  
208 showed coexpression Myocardin and STAT3 can weak the Myocardin-induced  
209 cardiomyocyte hypertrophy (Fig. 1D, E). We also knocked down the expression of  
210 endogenous STAT3 using si-STAT3. Our results show that knocked down  
211 endogenous STAT3 can relieve the inhibition of STAT3 on the expression of  
212 Myocardin activation of ANF and  $\alpha$ -actinin (Fig. 2A, B).

213 The JAK inhibitor, AG490 was used to attenuated endothelial STAT3 activation. Our  
214 results showed that AG490 significantly relieved the mRNA and protein expression  
215 of STAT3 suppressed Myocardin activation of cardiac genes in the presence of  
216 Myocardin in cardiomyocytes (Fig. 2C, D).

217 Taken together, these results indicate that STAT3 antagonizes the activation of  
218 myocardial genes by Myocardin.

### 219 **STAT3 affects the expression of Myocardin.**

220 To investigate the mechanism of STAT3 suppressed Myocardin activation of cardiac  
221 genes, qPCR assays were performed after overexpression of STAT3 in primary  
222 neonatal cardiomyocytes. Our data showed that overexpressing STAT3 did not affect  
223 the mRNA level of Myocardin (Fig. 3A).

224 Then we tested whether STAT3 could regulate the stability of Myocardin protein.  
225 The primary neonatal cardiomyocytes were transfected with a STAT3 plasmid for 48  
226 h. The expression of endogenous Myocardin has a litter decreased by overexpressing  
227 STAT3 (Fig.3B) and overexpressing STAT3 maybe phosphorylate the protein of  
228 Myocardin (see the top band in Fig. 3B). There have researches shown that  
229 phosphorylation of Myocardin by extracellular regulated protein kinases (ERK1/2)  
230 and phosphorylation of Myocardin by ERK1/2 reduces its induction of smooth  
231 muscle gene transcription.(17) Our results have shown that the STAT3 activator LIF  
232 promotes the phosphorylation of ERK but the STAT3 inhibitor AG490 inhibits ERK  
233 phosphorylation (Fig. 3C). Interestingly, the ERK activator lipopolysaccharide (LPS)  
234 promotes Myocaridn phosphorylation but the ERK inhibitor U0126 can inhibit the  
235 phosphorylation of Myocaridn (Fig. 3D). Thus, STAT3-ERK1/2-Myocardin forms a  
236 negative feedback loop regulating cardiomyocyte hypertrophy.



237 **STAT3 interacts directly with Myocardin.**

238 Next, we investigated whether myocardiin and STAT3 protein interact with  
239 co-immunoprecipitation assays with transfected COS7 cells. As shown in Fig.7,  
240 Myocardin specifically interacted with STAT3. To locate the domains of cardiomyin  
241 and STAT3 that mediate interactions, a series of Myocardiin and STAT3 deletion  
242 mutant proteins were used by coimmunoprecipitation (Fig. 4A, C). Myocardin  
243 protein deletion mutants lacking N-terminal residues up to amino acid 194 interact  
244 with STAT3, while mutant proteins lacking first 268 amino acids fail to interact with  
245 STAT3. The ability to interact with STAT3 was also retained when the protein of the  
246 265 C-terminal residue amino acid was deleted. Thus, STAT3 interacted with a  
247 distinct region near the N terminus (between amino acids 194 and 265, this is basic  
248 domain) (Fig. 4B). Myocardiin was confirmed to interact with SRF through a basic  
249 and glutamine-rich domain near the N-terminus.(18, 19) Because the STAT3-binding  
250 region of Myocardin overlapped the SRF-binding region, we considered the  
251 possibility that STAT3 may inhibit Myocardiin activity by replacing it with SRF..  
252 The ability of STAT3 to inhibit the activity of Myocardin depended ANF-luciferase  
253 reporter activity also reduces the potential replacement mechanism of STAT3  
254 inhibition. (Fig. 6).

255 With a series of STAT3 deletion mutant proteins, we found that a mutant protein  
256 lacking the 300 sequence of amino acid N still retains the ability to interact with  
257 Myocardin (Fig. 4D). However, this interaction was completely eliminated when the  
258 amino acid 250 was further deleted, suggesting that the region between residues 250  
259 and 300 is essential for STAT3 to interact with Myocardin. C-terminal deletion  
260 results indicate that residues downstream of amino acid 280 are not required to  
261 interact with Myocardiin (Fig. 4D). We concluded that a Myocardin-binding domain  
262 lies between amino acids 250 and 280 (coiled-coil domain) of STAT3.

263 When a STAT3 deletion mutant protein is present, there is a direct correlation  
264 between its ability to interact with and inhibit its activity. Thus, STAT3 can interact  
265 with and inhibit Myocardin, and only those STAT3 deletion mutant proteins that  
266 contain amino acids 250 and 280. It was worth noting that the C-terminal region of  
267 STAT3 (containing a transactivation domain) was not necessary for inhibiting  
268 myocardiin activity (Fig. 4D). These results demonstrated a direct interaction  
269 between the amino acids 250 and 280 (coiled-coil domain) of STAT3 and amino  
270 acids 194 and 265 (basic domain) Myocardin.

271 **Mutation the coiled-coil domain of STAT3 and the basic domain of Myocardin**  
272 **affect the interaction of Myocardin and STAT3 and its transcriptional activation**



273 This deletion mutant Myocardin basic domain [Myocardin (1-807)] abolished  
274 interactions between Myocardin and STAT3 but this mutant Myocardin Q-rich  
275 domain [Myocardin (1-807)] has interactions between STAT3. A construct  
276 containing this basic domain [Myocardin (1-807)] also bound STAT3 (Fig. 5A, B).  
277 These studies further support that the basic domain of Myocardin interacts in vitro  
278 with STAT3. Since a direct interaction between the amino acids 250 and 280  
279 (coiled-coil domain) of STAT3 and amino acids 194 and 265 (basic domain)  
280 Myocardin, we have mutated site-directed the amino acids (KK-NQ) of Myocardin  
281 basic domain (Mutation-Myocardin) (Fig. 5C) or the amino acids (DDE-GSQ) of  
282 STAT3 coiled-coil domain (Mutation-STAT3) (Fig. 5D).

283 Coimmunoprecipitation assays to test the interaction mutated site-directed the amino  
284 acids (KK-NQ) of Myocardin basic domain (Mutation-Myocardin) and STAT3 or  
285 mutated site-directed the amino acids (DDE-GSQ) of STAT3 coiled-coil domain  
286 (Mutation-STAT3) and Myocardin. Our data show that Mutation-Myocardin has no  
287 interaction with STAT3 (Fig. 5E) and Mutation-STAT3 has no interaction with  
288 Myocardin (Fig. 5F). Taken together, these data indicate that the interaction between  
289 Myocardin and STAT3 is produced by the positive charge of the amino acids KK of  
290 the Myocardin basic domain and the negative charge of the amino acids DDE of the  
291 STAT3 coiled-coil domain.

292 To investigate the role of transcription activation and expression of ANF after  
293 mutation the coiled-coil domain of STAT3 and the basic domain of Myocardin, the  
294 qPCR and luciferase reporter and western bolt assay were used to test the  
295 transcription activation and expression of ANF. As shown in Fig. 5G, H and I,  
296 overexpressed Myocardin will strongly active the expression of cardiac gene (ANF)  
297 but the cotransfected Myocardin and STAT3 decreased Myocardin-induced cardiac  
298 gene expression compared with that in transfected Myocardin cells, Mutation-STAT3  
299 significantly relieved the mRNA and protein expression of STAT3 suppressed  
300 Myocardin activation of ANF in the presence of Myocardin in cardiomyocytes. More  
301 importantly, Mutation-Myocardin significantly relieved the mRNA and protein  
302 expression of STAT3 suppressed Myocardin activation of ANF in the presence of  
303 STAT3 in cardiomyocytes. Thus, STAT3 inhibits Myocardin induced cardiac  
304 hypertrophy gene expression through their interaction, mutation the interaction of the  
305 site, this effect has disappeared.

### 306 **STAT3 interferes with the SRF–Myocardin interaction**

307 In order to understand the molecular mechanism by which STAT3 inhibits  
308 myocardiin function, we asked whether STAT3 can interfere with myocardiin-SRF

309 interactions. To investigate this, we transfected cells with Myc-Myocardin and  
310 HA-SRF and followed their binding after silencing (Figure 6A) or over-expressing  
311 STAT3 (Fig. 6B). The former condition was significantly enhanced, while the latter  
312 significantly reduced the binding of SRF to Myocardin. Indeed,  $\Delta$ coiled-coil retained  
313 substantial ANF promoter-inducing activity (Fig. 6D), whereas its combination with  
314 STAT3 was greatly reduced (Fig. 6C). Importantly,  $\Delta$ coiled-coil was much less  
315 sensitive to the inhibitory action of STAT3 than the WT (Fig. 6D). These findings  
316 suggest that the key mechanism for STAT3-mediated ANF promoter inhibition is the  
317 binding of STAT3 to Myocardin.

### 318 **Myocardin and STAT3 promote the transactivity of ANF depending on CArG** 319 **box**

320 Myocardin coordinate and regulate the expression of a variety of CArG-dependent  
321 cardiac genes. Previously, it was found that incorrect expression of cardiac proteins in  
322 *Xenopus* cap analysis was not sufficient to induce beating or cardiac-like coordinated  
323 contractions.(20) Although Myocardin does not directly bind to DNA, the binding of  
324 SRF to the CArG box (CC (A/T)<sub>6</sub>GG) will cause a sharp bend in the DNA, and this  
325 bend may change with the change in base composition in the entire CArG box.(21)  
326 All STATs bind to similar SIE/GAS DNA sequences that contain the TT and AA base  
327 tandems, separated in STAT3 by 4 to 6 bases (5'-TTN<sub>4-6</sub>AA-3').(22, 23) By  
328 bioinformatics analysis, we found that the ANF promoter has two CArG box sites and  
329 a GAS-like site (Fig. 7A). To further determine whether STAT3 affects the  
330 transactivation of Myocardial-mediated ANF promoters and to investigate whether  
331 this process depends on the CArG box, The ANF gene promoter luciferase reporter  
332 plasmid was constructed to contain a deleted or mutated CArG box. (Fig. 7A, B). Our  
333 data indicate that Myocardial-mediated ANF promoter activity is abolished in vitro  
334 when the CArG box is deleted or mutated in the ANF promoter, while nearby CArG  
335 boxes play an important role in Myocardial-mediated ANF promoter activity (Fig. 7C,  
336 D). The above experimental data show that the transactivation of ANF by Myocardin  
337 depends on the CArG box.

338 As shown in Fig. 7C and 7D, overexpressing Myocardin strongly activated the  
339 expression of ANF-1000-luc promoter. However, coexpression Myocardin and  
340 STAT3 repressed Myocardin-dependent ANF transcriptional activity compared with  
341 that in transfected Myocardin cells. These data demonstrate that STAT3 serves as a  
342 negative regulator of cardiac muscle differentiation in the presence of Myocardin  
343 through downregulation of Myocardin activity.

344 To further confirm the specific binding of Myocardin to ANF promoter, ChIP assays

345 were performed in cardiomyocytes transfected with Myocardin, Myocardin /STAT3  
346 or vector. Immunoprecipitation of cross-linked chromatin with specific antibodies  
347 against Myocardin or without antibodies (as negative control). The precipitated  
348 chromatin DNA was then purified and PCR amplified using specific primers across  
349 the CArG box in the ANF promoter. As shown in Fig. 7E and 7F, the comparison  
350 (IgG) and the negative control (No Ab) did not show any PCR signals. Myocardiin  
351 can be combined with the CArG box of the ANF promoter (both near (CArG 1) and  
352 long-range (CArG 2) CArG boxes). Myocardiin binds to the near CArG box more  
353 than the ability to bind to the far CArG box in the ANF promoter (Fig. 7E, F). More  
354 importantly, STAT3 has the effect of inhibiting Myocardiin. (Fig. 7E, F). These data  
355 indicate that STAT3 is a potent nuclear factor that inhibits the transactivation of the  
356 Myocardium by disrupting the formation of the SRF/Myocardin/CArG complex in  
357 vivo and in vitro.

### 358 **Knockdown stat3 inhibits Myocardin knockdown-mediated cardiac** 359 **hypertrophy in zebrafish**

360 To further validate the conclusions in vitro and the effects of Myocardin and STAT3  
361 interactions on cardiac development, Myocardin-MO, STAT3-MO and control-MO  
362 targeting ATG were synthesized and microinjection into the zebrafish embryos. The  
363 developmental process of the zebrafish heart is observed by the expression of the  
364 cardiac development marker gene CMCL2. The results show that the heart cannot be  
365 circulated normally when STAT3 is knocked down. While co-injecting  
366 Myocardin-MO and STAT3-MO, most of the fish's heart showed near normal  
367 cyclization, but there were still some malformations (Fig. 8A). We also characterized  
368 cardiac hypertrophy by detecting the ANF gene. Microinjection of STAT3-MO alone  
369 induced cardiac hypertrophy. When we injected Myocardin-MO and STAT3-MO  
370 together, cardiac hypertrophy was alleviated (Fig. 8B). In addition, significant  
371 up-regulation of ANF expression could be clearly observed when knocking down  
372 STAT3 (Fig. 8B), which confirmed our conclusions in primary cardiomyocytes.  
373 These results indicated that STAT3 could antagonize Myocardin-mediated cardiac  
374 hypertrophy in vivo.

## 375 **Discussion**

376 Myocardin, which plays a key role in inducing cardiac hypertrophy and fetal cardiac  
377 genetic programs, as a co-activator of SRF,(1). However, the molecular mechanism  
378 in regulating the stability and activity of Myocardin is unclear. Despite recent  
379 evidence that STAT3 plays a cardioprotective role in the heart, there is no

380 information on the role of STAT3 in Myocardial-induced myocardial hypertrophy.  
381 This study revealed the relationship between Myocardiin and STAT3 in the  
382 development of cardiac hypertrophy.  
383 Our study has shown that Myocardin and STAT3 have physically interaction by  
384 co-immunoprecipitation. More importantly, our data demonstrated a direct  
385 interaction between the amino acids 250 and 280 (coiled-coil domain) of STAT3 and  
386 amino acids 194 and 265 (basic domain) Myocardin (Fig. 4). So that we  
387 hypothesized that STAT3 was a coactivator for Myocardin, the regulator of  
388 cardiomyocyte hypertrophy. Interestingly, we find that co-expression of Myocardin  
389 and STAT3 can decrease Myocardin-induced cardiac gene expression compared with  
390 that in transfected Myocardin alone in cardiomyocytes (Fig. 1). Silenced STAT3 via  
391 siSTAT3 can relieve STAT3 inhibiting Myocardin activation of cardiac genes (Fig.  
392 2A, B). Microinjection of STAT3-MO alone into zebrafish induced cardiac  
393 hypertrophy. When we injected Myocardin-MO and STAT3-MO together, cardiac  
394 hypertrophy was alleviated (Fig. 8B). In addition, significant up-regulation of ANF  
395 expression could be clearly observed when knocking down STAT3, which confirmed  
396 our conclusions in primary cardiomyocytes. The influence that AG490 could block  
397 the phosphorylation of JAK2 would restrain the phosphorylation of STAT3. AG490  
398 would weak the effect of STAT3 inhibit Myocardin by restraining the  
399 phosphorylation of STAT3 (Fig. 2C, D). Mutation the coiled-coil domain of STAT3  
400 and the basic domain of Myocardin affect the interaction of Myocardin and STAT3  
401 and Myocardin activation of cardiac genes transcriptional activation (Fig. 5G, H and  
402 D).

403 We also provide evidence that far-CArG (CArG2) and near-CArG (CArG1) in the  
404 ANF promoter are essential for promoter function in cardiomyocytes. But the  
405 function of near-CArG is more powerful than the far-CArG (Fig. 7C, D). These  
406 results indicate that this spacing of the paired CArG elements contributes to the  
407 synergistic combination of SRF and its coactivator Myocardin with the ANF  
408 promoter. STAT3 inhibits Myocardial activation of CArG-dependent cardiac gene  
409 expression. The effect mediated by physical interruption of the  
410 Myocardin/SRF/CArG ternary complex (Fig. 7E, F). Our data demonstrate that  
411 STAT3 can behave as a negative transcriptional cofactor in a Myocardin-dependent  
412 manner to inhibit cardiomyocyte hypertrophy.

413 Why does STAT3 inhibit Myocardin transactivity? Firstly, STAT3 can directly  
414 inhibit Myocardin-dependent transcriptional activity, qPCR assays were performed  
415 in transfected STAT3 primary neonatal cardiomyocytes. But our data show that  
416 overexpressing STAT3 did not affect the mRNA level Myocardin. The expression of

417 endogenous Myocardin has a litter decreased by overexpressing STAT3 (Fig. 3B)  
418 and overexpressing STAT3 maybe phosphorylate the protein of Myocardin (see the  
419 top band in Fig. 3B). There have researches shown that phosphorylation of  
420 Myocardin by ERK1/2 and phosphorylation of Myocardin by ERK1/2 reduces its  
421 induction of smooth muscle gene transcription.(17, 24) Our results have shown that  
422 the STAT3 activator LIF promotes the phosphorylation of ERK but the STAT3  
423 inhibitor AG490 inhibits ERK phosphorylation (Fig. 3C). Interestingly, the ERK  
424 activator LPS promotes Myocaridn phosphorylation but the ERK inhibitor U0126  
425 can inhibit the phosphorylation of Myocaridn (Fig. 3 D). The molecular mechanism  
426 may be the phosphorylation modification of Myocardin by STAT3. And the  
427 phosphorylation modification of Myocardin might be prone to decomound by  
428 ubiquitin. Recently, Protein inhibitor of activated STAT 1(PIAS1) has been reported  
429 to regulate Myocardin transactivity via its ligase induced sumoylation. These results  
430 indicate that PIAS1 and small ubiquitin-like modifier 1 (SUMO1) enhance  
431 Myocardiin activity through SUMO-modified Myocardial proteins..(25, 26) Protein  
432 inhibitor of activated STAT represents a family of proteins originally identified  
433 through interaction with cytokine-induced STAT.(27) PIAS1 binds to STAT1 and  
434 inhibits the transcriptional activity of STAT1 by blocking its DNA-binding  
435 activity.(28, 29) STAT3 and STAT1 form complexes in response to LIF  
436 stimulation.(30) Thus, it is also possible that STAT3 inhibits Myocardin transactivity  
437 by inhibiting SUMO modification of Myocardin by PIAS1 and SUMO1. The  
438 specific binding site that both SUMO modification of Myocardin by PIAS1/SUMO1  
439 and ubiquitin modification is the site KXE (IKQE). The competition between SUMO  
440 modification and ubiquitin modification of Myocardin at the same site KXE (IKQE)  
441 regulates Myocardin transactivity.  
442 Taken together, these data demonstrate that STAT3 serves as a negative regulator of  
443 Myocardin activity to regulate cardiomyocyte hypertrophy.

## 444 **Conclusion**

445 The N-terminus of STAT3 directly binds to the basic domain of myocardin and  
446 inhibits the transcriptional activity of myocardin-mediated cardiac-specific genes  
447 ANF and  $\alpha$ -actinin, thereby inhibiting their expression, and further inhibit  
448 myocardin-mediated cardiac hypertrophy in vivo. The STAT3-Myocardin interaction  
449 identifies a site of convergence for nuclear hormonereceptor-mediated and  
450 cardiac-specific gene regulation and suggests a possible mechanism for the cardiac  
451 protective effects.

## 452 **Abbreviations**

453 STAT3, signal transducer and activator of transcription 3; SRF, serum response  
454 factor;  
455 IL-6, interleukin-6; LIF, leukemia inhibitory factor; DMEM, Dulbecco's modified  
456 Eagle's medium; DAPI, 4',6'-diamidino-2-phenylindole; RT-PCR, semi-quantitative  
457 reverse-transcription polymerase chain reaction; qPCR, real time quantitative  
458 polymerase chain reaction; GAPDH, Glyceraldehyde-3-phosphate dehydrogenase;  
459 PAGE, sodium dodecyl sulfate-polyacrylamide gel electrophoresis; ChIP, Chromatin  
460 Immunoprecipitation; JAK, Janus kinase; LPS, lipopolysaccharide; ERK1/2,  
461 extracellular regulated protein kinases; PIAS1, protein inhibitor of activated STAT 1;  
462 SUMO1, small ubiquitin-like modifier 1; MO, Morpholino.

#### 463 **Ethics declarations**

#### 464 **Ethics approval and consent to participate**

465 The research is approved by an ethical committee of Wuhan University of Science  
466 and Technology.

#### 467 **Consent for publication**

468 Not applicable.

#### 469 **Availability of data and materials**

470 All data, models, and code generated or used during the study appear in the  
471 submitted article. After all experiments were completed, they were executed using  
472 MS-222.

#### 473 **Funding**

474 This work was financially supported by National Natural Science Foundation of  
475 China (No. 31501149, 31401117, 31471282, 31440038, 31270837). The science and  
476 technology young training program of the Wuhan University of Science and  
477 Technology (2016) (2016xz035).

#### 478 **Authors' contributions**

479 Xing-Hua Liao and Tong-Cun Zhang designed research; Jia-Peng Li, Yuan Xiang,  
480 Hui Li, You Huang and Chao Shen performed research; Jia-Peng Li, Yuan Xiang,  
481 Hui Li and Xing-Hua Liao analyzed data; Hui-Min Zhang, Xing-Hua Liao and



482 Tong-Cun Zhang wrote the paper.

## 483 **Acknowledgements**

484 Not applicable.

## 485 **Competing interests**

486 The authors declare that they have no competing interests.

## 487 **Reference**

- 488 1. Owens GK, Kumar MS and Wamhoff BR: Molecular Regulation of Vascular Smooth Muscle  
489 Cell Differentiation in Development and Disease. *Physiological Reviews* 84: 767-801, 2004.
- 490 2. Posern G and Treisman R: Actin' together: serum response factor, its cofactors and the link to  
491 signal transduction. *Trends in Cell Biology* 16: 588-596, 2006.
- 492 3. Xing W, Zhang TC, Cao D, et al.: Myocardin induces cardiomyocyte hypertrophy. *Circulation*  
493 *Research* 98: 1089-1097, 2006.
- 494 4. Wang DZ and Olson EN: Control of smooth muscle development by the myocardin family of  
495 transcriptional coactivators. *Current Opinion in Genetics & Development* 14: 558-566, 2004.
- 496 5. Liu Y, Sinha S, McDonald OG, Shang Y, Hoofnagle MH and Owens GK: Kruppel-like Factor 4  
497 Abrogates Myocardin-induced Activation of Smooth Muscle Gene Expression. *Journal of Biological*  
498 *Chemistry* 280: 9719-9727, 2005.
- 499 6. Liu ZP, Wang Z, Yanagisawa H and Olson EN: Phenotypic modulation of smooth muscle cells  
500 through interaction of Foxo4 and myocardin. *Developmental Cell* 9: 261-270, 2005.
- 501 7. Wang M, Zhang W, Crisostomo P, et al.: Endothelial STAT3 plays a critical role in generalized  
502 myocardial proinflammatory and proapoptotic signaling. *American Journal of Physiology Heart &*  
503 *Circulatory Physiology* 293: H2101, 2007.
- 504 8. Yamauchi-Takahara K and Kishimoto T: A novel role for STAT3 in cardiac remodeling. *Trends*  
505 *in Cardiovascular Medicine* 10: 298-303, 2000.
- 506 9. Hilfiker-Kleiner D, Hilfiker A and Drexler H: Many good reasons to have STAT3 in the heart.  
507 *Pharmacology & Therapeutics* 107: 131-137, 2005.
- 508 10. Kodama H, Fukuda K, Pan J, et al.: Biphasic Activation of the JAK/STAT Pathway by  
509 Angiotensin II in Rat Cardiomyocytes. *Circulation Research* 82: 244-250, 1998.
- 510 11. Mitcheson JS, Hancox JC and Levi AJ: Cultured adult cardiac myocytes: future applications,  
511 culture methods, morphological and electrophysiological properties. *Cardiovascular Research* 39:  
512 280-300, 1998.
- 513 12. Suzuki T, Tsuruda A, Katoh S, Kubodera A and Mitsui Y: Purification of Endothelin From a  
514 Conditioned Medium of Cardiac Fibroblastic Cells Using Beating Rate Assay of Myocytes Cultured  
515 in a Serum-free Medium ☆. *Journal of Molecular & Cellular Cardiology* 29: 2087-2093, 1997.
- 516 13. Lim HW, New L, ., Han J, . and Molkentin JD: Calcineurin enhances MAPK phosphatase-1  
517 expression and p38 MAPK inactivation in cardiac myocytes. *Journal of Biological Chemistry* 276:  
518 15913, 2001.
- 519 14. Xing-Hua L, Da-Lin L, Nan W, et al.: Estrogen receptor  $\alpha$  mediates proliferation of breast cancer



- 520 MCF-7 cells via a p21/PCNA/E2F1-dependent pathway. *Febs Journal* 281: 927-942, 2014.
- 521 15. Le AT, Yelon D and Stainier DYR: Hand2 Regulates Epithelial Formation during Myocardial  
522 Differentiation. *Current Biology* Cb 15: 879-881, 2005.
- 523 16. Haibo J, King IN, Chopra SS, et al.: Vertebrate heart growth is regulated by functional  
524 antagonism between Gridlock and Gata5. *Proceedings of the National Academy of Sciences of the*  
525 *United States of America* 104: 14008-14013, 2007.
- 526 17. Sebastien T, Nathan S, Yau DM, Nan S, Jacob K and Dulin NO: Phosphorylation of myocardin  
527 by extracellular signal-regulated kinase. *Journal of Biological Chemistry* 284: 33789-33794, 2009.
- 528 18. Wang DZ, Chang PS, Wang Z, et al.: Activation of Cardiac Gene Expression by Myocardin, a  
529 Transcriptional Cofactor for Serum Response Factor. *Cell* 105: 851-862, 2001.
- 530 19. Zhigao W, Da-Zhi W, Dirk H, John MA, Alfred N and Olson EN: Myocardin and ternary  
531 complex factors compete for SRF to control smooth muscle gene expression. *Nature* 428: 185-189,  
532 2004.
- 533 20. Small EM, Warkman AS, Da-Zhi W, Sutherland LB, Olson EN and Krieg PA: Myocardin is  
534 sufficient and necessary for cardiac gene expression in *Xenopus*. *Development* 132: 987-997, 2005.
- 535 21. Pellegrini L, ., Tan S, . and Richmond TJ: Structure of serum response factor core bound to DNA.  
536 *Nature* 376: 490, 1995.
- 537 22. Bowman T, ., Garcia R, ., Turkson J, . and Jove R, . STATs in oncogenesis. *Oncogene* 19:  
538 2474-2488, 2000.
- 539 23. Bromberg J, . and Darnell JE: The role of STATs in transcriptional control and their impact on  
540 cellular function. *Oncogene* 19: 2468-2473, 2000.
- 541 24. Xing-Hua L, Nan W, Dong-Wei Z, et al.: STAT3 Protein Regulates Vascular Smooth Muscle  
542 Cell Phenotypic Switch by Interaction with Myocardin. *Journal of Biological Chemistry* 290: 19641,  
543 2015.
- 544 25. Jun W, Ankan L, Zhigao W, Xinhua F, Olson EN and Schwartz RJ: Myocardin sumoylation  
545 transactivates cardiogenic genes in pluripotent 10T1/2 fibroblasts. *Molecular & Cellular Biology* 27:  
546 622, 2007.
- 547 26. Liao XH, Wang N, Zhao DW, et al.: NF- $\kappa$ B (p65) negatively regulates myocardin-induced  
548 cardiomyocyte hypertrophy through multiple mechanisms. *Cellular Signalling* 26: 2738-2748, 2014.
- 549 27. Chung CD, Liao J, ., Liu B, ., et al.: Specific inhibition of Stat3 signal transduction by PIAS3.  
550 *Science* 278: 1803-1805, 1997.
- 551 28. Taruna A, Bin L, Hongchin H, et al.: PIASx is a transcriptional co-repressor of signal transducer  
552 and activator of transcription 4. *Journal of Biological Chemistry* 278: 21327-21330, 2003.
- 553 29. Liu B, ., Liao J, ., Rao X, ., et al.: Inhibition of Stat1-mediated gene activation by PIAS1. *Proc*  
554 *Natl Acad Sci U S A* 95: 10626-10631, 1998.
- 555 30. Sun L, Ma K, Wang H, et al.: JAK1-STAT1-STAT3, a Key Pathway Promoting Proliferation and  
556 Preventing Premature Differentiation of Myoblasts. *The Journal of Cell Biology*.

557

## 558 **Figure legends**

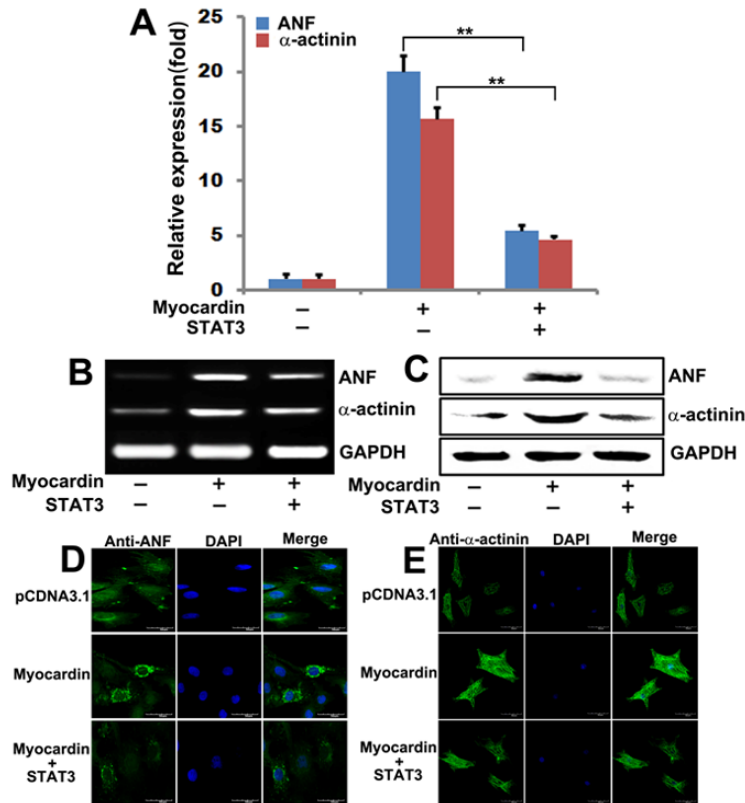

559

560 **Fig. 1 STAT3 suppresses Myocardin activation of cardiac genes.**

561 **A and B** qPCR and RT-PCR analysis of transfected with Myocardin or  
562 Myocardin/STAT3 for 48 h in cardiomyocytes. GAPDH served as loading control.

563 (\*\*,  $p < 0.01$ ) Data are expressed as the mean  $\pm$  SEM with  $N = 3$  biological

564 replicates in each group. All data are analysed using paired t-test. **C** Western blot

565 analysis of transfected with Myocardin or Myocardin/STAT3 for 48 h in

566 cardiomyocytes. GAPDH served as loading control. **D** The representative image

567 shows ANF and  $\alpha$ -actinin expression in cardiomyocytes transfected with Myocardin

568 or Myocardin/STAT3 for 48 h. The left panels (green) show anti- ANF or  $\alpha$ -actinin

569 antibody reactivity to demonstrate gross morphology. The middle panels (blue) show

570 the DAPI staining for nuclei. The right panels show double immunostained for ANF

571 or  $\alpha$ -actinin and nuclei. Scale = 50 $\mu$ m.

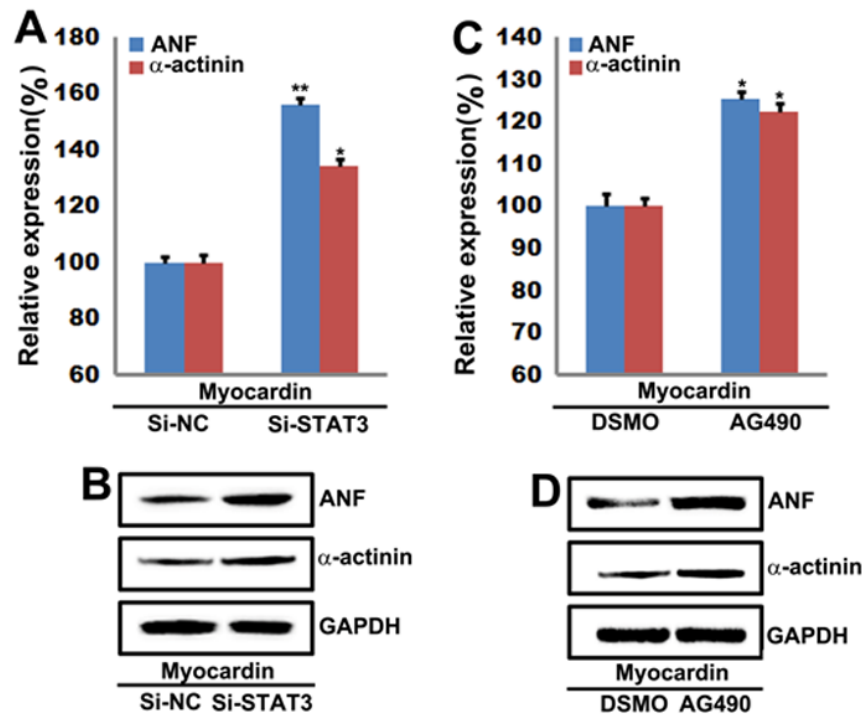

572

573 **Fig.2 Silenced STAT3 and inhibited phosphorylation of STAT3 via AG490 can**  
574 **relieve STAT3 inhibiting Myocardin activation of cardiac genes.**

575 **A** qPCR analysis to detect the mRNA level of ANF and  $\alpha$ -actinin in cardiomyocytes  
576 transfected with Myocardin and then treated with siSTAT3 for 48 h. GAPDH served

577 as loading control. (\*\*,  $p < 0.01$ , \*,  $p < 0.05$ ). **B** Western blot analysis to detect the

578 protein level of ANF and  $\alpha$ -actinin transfected with Myocardin and then treated with

579 siSTAT3 for 48 h in cardiomyocytes. GAPDH served as loading control. **C** qPCR

580 analysis to detect the mRNA level of ANF and  $\alpha$ -actinin in cardiomyocytes

581 transfected with Myocardin and then treated with AG490 for 24 h. GAPDH served

582 as loading control. (\*\*,  $p < 0.01$ , \*,  $p < 0.05$ ). **D** Western blot analysis to detect the

583 protein level of ANF and  $\alpha$ -actinin transfected with Myocardin and then treated with

584 AG490 for 24 h in cardiomyocytes. GAPDH served as loading control. Data are

585 expressed as the mean  $\pm$  SEM) with  $N = 3$  biological replicates in each group.

586 All data are analysed using paired t-test.

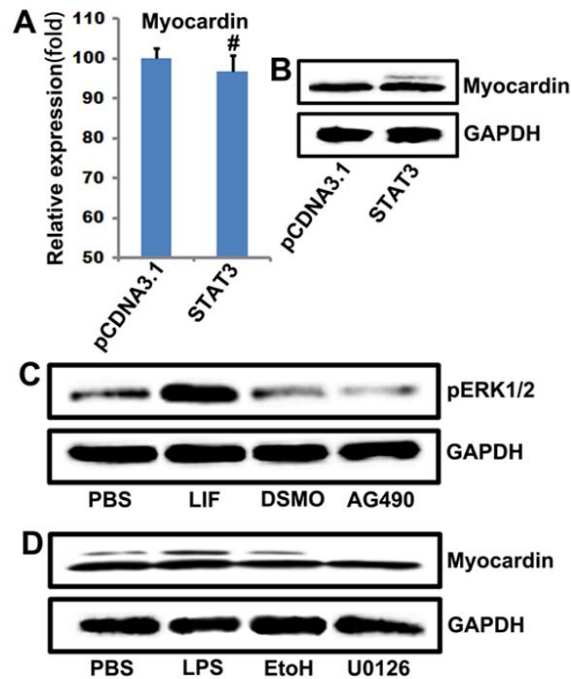

587

588 **Fig.3 STAT3 affects the expression of Myocardin.**

589 **A** and **B** qPCR and Western blot analysis to detect expression of Myocardin in  
590 cardiomyocytes transfected with STAT3 for 48 h. GAPDH served as loading control.

591 (#,  $p > 0.05$ ) Data are expressed as the mean  $\pm$  SEM) with  $N = 3$  biological

592 replicates in each group. All data are analysed using paired t-test. **C** Western blot

593 analysis of the phosphorylated ERK1/2 treated with LIF or AG490 for 24 h in

594 cardiomyocytes. **D** Western blot analysis of the expression of Myocardin treated with

595 LPS or U0126 for 24 h in cardiomyocytes.

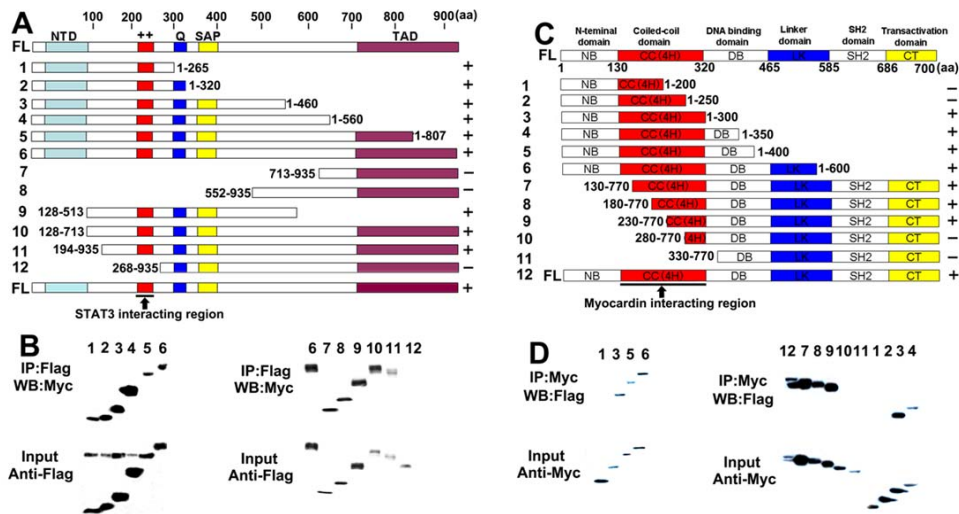

596

597 **Fig. 4 Direct interaction of Myocardin and STAT3 and mapping of the domains**  
598 **that mediate their interaction.**

599 **A** Schematic diagram of Myocardin and the mutant forms used to map the  
600 STAT3-binding domain. **B** Coimmunoprecipitation assays. COS7 cells were  
601 transiently transfected with expression vectors encoding Flag-tagged Myocardin  
602 deletion mutant proteins and Myc-tagged STAT3. Flag-tagged Myocardin deletion  
603 mutant proteins were immunoprecipitated (IP) from cell lysates with a monoclonal  
604 anti-Flag antibody, and coimmunoprecipitating STAT3 was detected by  
605 immunoblotting (IB) with a monoclonal anti-Myc antibody (top parts). The  
606 membrane was reprobbed with anti-Flag antibody to reveal the total amount of  
607 Flag-tagged Myocardin proteins (bottom parts). **C** Schematic diagram of STAT3 and  
608 the mutant forms used to map the Myocardin-binding domain. **D**  
609 Coimmunoprecipitation assays. COS7 cells were transiently transfected with  
610 expression vectors encoding Myc-tagged STAT3 deletion mutant proteins and  
611 Flag-tagged Myocardin. Myc-tagged STAT3 deletion mutant proteins were  
612 immunoprecipitated (IP) from cell lysates with a monoclonal anti-Flag antibody, and  
613 coimmunoprecipitating Myocardin was detected by immunoblotting (IB) with a  
614 monoclonal anti-Flag antibody (top parts). The membrane was reprobbed with  
615 anti-Myc antibody to reveal the total amount of Myc-tagged STAT3 proteins (bottom  
616 parts).

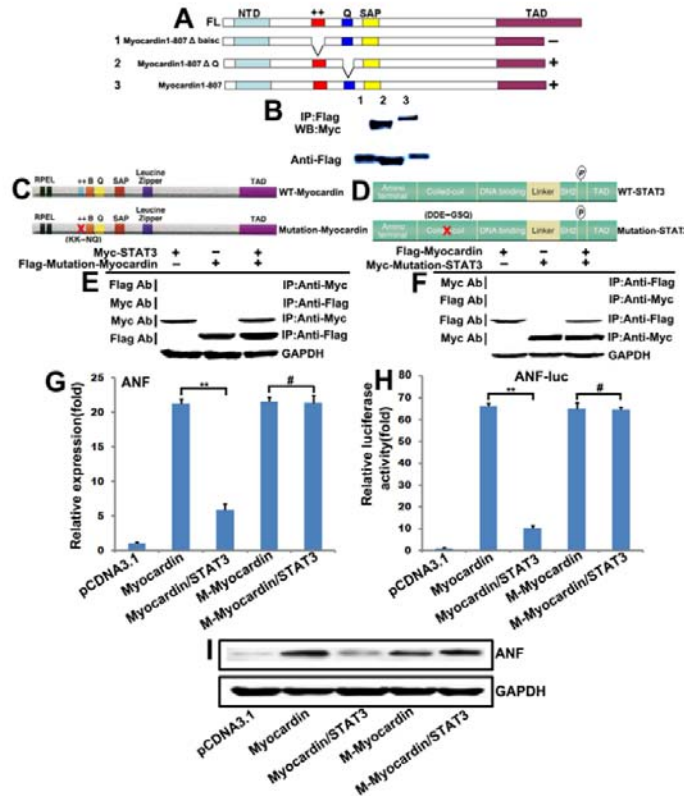

617

618 **Fig. 5 Mutation the coiled-coil domain of STAT3 and the basic domain of**  
 619 **Myocardin affect the interaction of Myocardin and STAT3 and its**  
 620 **transcriptional activation.**

621 **A** Coimmunoprecipitation assays. COS7 cells were transiently transfected with  
 622 expression vectors encoding Flag-tagged Myocardin deletion mutant (basic domain  
 623 and SAP domain) proteins and Myc-tagged STAT3. Flag-tagged Myocardin deletion  
 624 mutant proteins were immunoprecipitated (IP) from cell lysates with a monoclonal  
 625 anti-Flag antibody, and coimmunoprecipitating STAT3 was detected by  
 626 immunoblotting (IB) with a monoclonal anti-Myc antibody (top parts). The  
 627 membrane was reprobed with anti-Flag antibody to reveal the total amount of  
 628 Flag-tagged Myocardin proteins (bottom parts). **B** and **C** Schematic of mutated  
 629 site-directed the amino acids (KK-NQ) of Myocardin basic domain  
 630 (Mutation-Myocardin) and mutated site-directed the amino acids (DDE-GSQ) of  
 631 STAT3 coiled-coil domain (Mutation-STAT3). **E** and **F** Coimmunoprecipitation  
 632 assays in mutated site-directed the amino acids (KK-NQ) of Myocardin basic  
 633 domain (Mutation-Myocardin) and STAT3 or mutated site-directed the amino acids  
 634 (DDE-GSQ) of STAT3 coiled-coil domain (Mutation-STAT3) and Myocardin. **G**, **H**  
 635 and **I** QPCR, Luciferase assay and Western blot analysis to detect expression of ANF  
 636 in cardiomyocytes transfected with Mutation the coiled-coil domain of STAT3 and

637 Myocardin or the basic domain of Myocardin and STAT3 for 48 h. GAPDH served  
 638 as loading control (\*\*,  $p < 0.01$ , #,  $p > 0.05$ ) Data are expressed as the  
 639 mean  $\pm$  SEM) with  $N = 3$  biological replicates in each group. All data are  
 640 analysed using paired t-test.

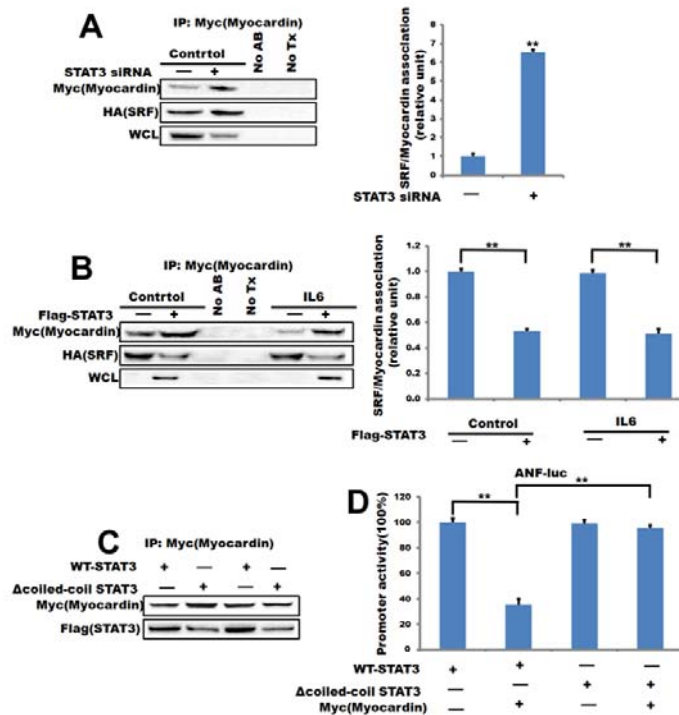

641

642 **Fig. 6 STAT3 interferes with Myocardin-SRF interaction.**

643 **A** Cells were transfected with Myc-Myocardin and HA-SRF along with NC or  
 644 STAT3 siRNA. Association of Myocardin and SRF was analyzed by  
 645 coimmunoprecipitation. STAT3 silencing was detected from whole cell lysates  
 646 (WCL). Controls for the immunoprecipitation were reaction without antibody (No  
 647 AB) or Myc transfection (No Tx). (right) Densitometric analysis of three  
 648 experiments is shown. **B** Myc-Myocardin and HA-SRF were cotransfected with  
 649 empty vector or STAT3. Myocardin was immunoprecipitated with anti-Myc antibody  
 650 as in A from control or LCM-treated (1 h) cells. **C** Coimmunoprecipitation shows  
 651 decreased association of STAT3 to  $\Delta$ coiled-coil compared with WT. **D** Coiled-coil  
 652 domain mutant shows reduced sensitivity to inhibition by STAT3. Cells were  
 653 transfected with ANF-Luc,  $\Delta$ coiled-coil, or WT-Myocardin along with empty vector  
 654 or STAT3. Luciferase assay was performed 48 h later. Results are normalized to the  
 655 control (top; fold increase over control) or expressed as a percentage of the maximal  
 656 effect of the given Myocardin construct (bottom). \*\*,  $p < 0.01$ . Error bars indicate  
 657 mean  $\pm$  SEM.



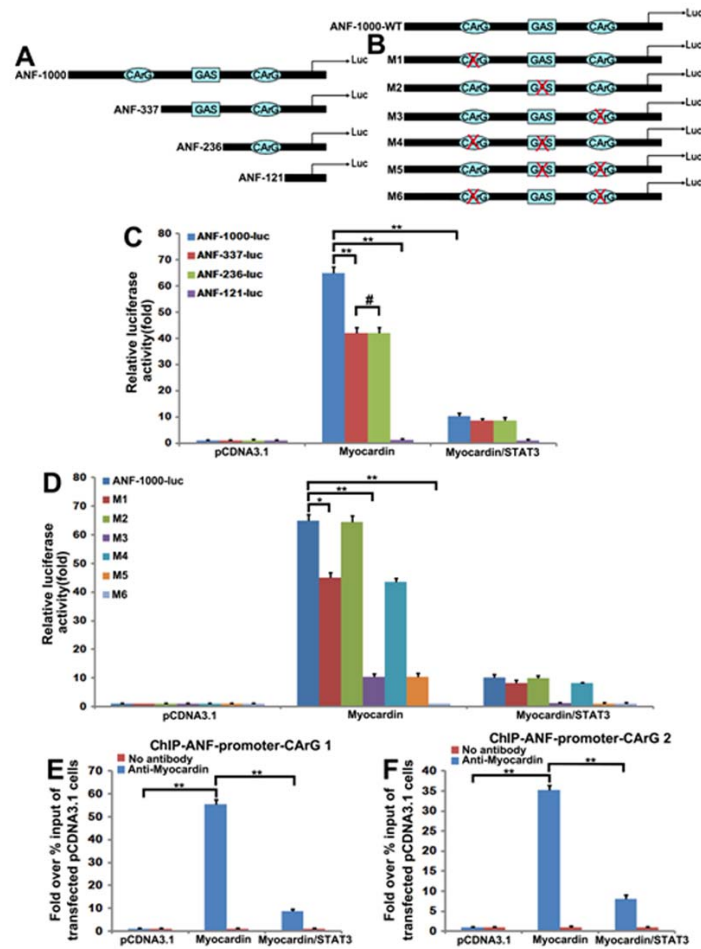

658

659 **Fig. 7 STAT3 inhibits Myocardin-induced the transactivity of ANF depending**  
 660 **on CARG box.**

661 **A** Schematic of the -1000 ANF promoter, containing CARG box element was linked  
 662 to a luciferase reporter. Mutation or truncations that remove the CARG box element.  
 663 -337, -236 and -121 ANF promoter, a truncated promoter. **B** The -1000 ANF  
 664 promoter with mutations in CARG box. **C** Cardiomyocytes were transfected with the  
 665 Wild-Type-1000 ANF promoter, or a truncated promoter -337, -236 or -121 and  
 666 transfected with Myocardin or STAT3 for 48 h. Then the luciferase reporter assays  
 667 were used to test the transactivity of ANF. **D** Cardiomyocytes were transfected with  
 668 the Wild-Type-1000 ANF promoter, or -1000 ANF promoter with mutations in CARG  
 669 box and transfected with Myocardin or STAT3 for 48 h. Then the luciferase reporter  
 670 assays were used to test the transactivity of ANF. (\*\*,  $p < 0.01$ , \*,  $p < 0.05$ ). **E and F**  
 671 Cardiomyocytes were transiently transfected with a Myocardin, Myocardin /STAT3  
 672 or a control vector (pCDNA3.1) 48 h, and ChIP assays were performed by PCR with  
 673 primers associated with the genes for ANF as described in Materials and Methods.

674 Sheared DNA/protein complexes were immunoprecipitated by using an  
675 anti-Flag-Myocardin Ab. Then, PCR was carried out to detect the endogenous CArG  
676 regions in immunoprecipitated chromatin fragments. The amount of DNA in each  
677 sample (2% input) is shown at the second land. Immunoprecipitations were  
678 performed without primary antibody (No Ab) as a control and IgG as a negative  
679 control (\*\*,  $p < 0.01$ ). Data are expressed as the mean  $\pm$  SEM with  $N = 3$   
680 biological replicates in each group. All data are analysed using paired t-test.

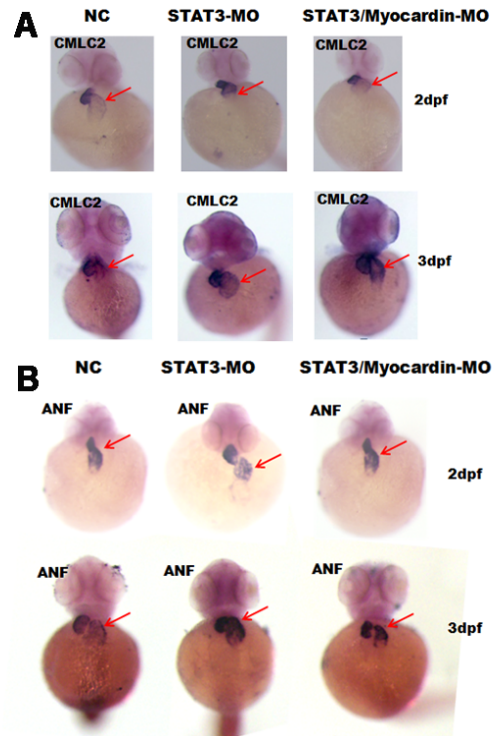

681  
682 **Fig.8 STAT3 antagonizes Myocardin-mediated cardiac hypertrophy.**  
683 Microinjection of Myocardin-MO, STAT3/Myocardin-MO and control-MO  
684 separately into the zebrafish embryos, and then the zebrafish embryos were  
685 subjected to in situ hybridization of the entire embryo. **A** Expression of CMLC2  
686 2 days (upper) and 3 days (bottom) after fertilization. ( $n > 30$ ). **B** Expression of ANF  
687 2 days (upper) and 3 days (bottom) after fertilization. ( $n > 30$ ).

688  
689

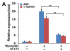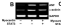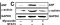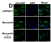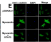

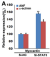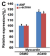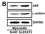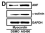

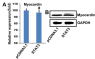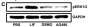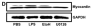

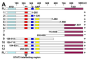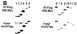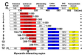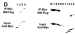

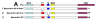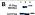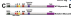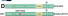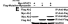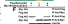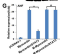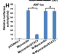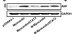



**A**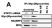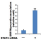**B**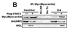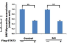**C**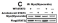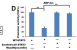

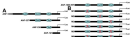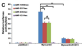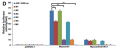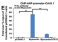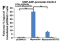

**A**

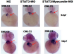

**B**

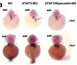

Source: https://www.biorxiv.org/content/10.1101/2020.11.21.392902v1.full.pdf
